# Supplementary material for: Luminescent protein staining with Re(i) tetrazolato complexes
Source: Royal Society of Chemistry journal article supplement (doi:10.1039/c8dt02052c), 2018-01-01
Supplement: c8dt02052c1.pdf [file c8dt02052c1.pdf]

## Luminescent Protein Staining with Re(I) Tetrazolato Complexes

Valentina Fiorini,<sup>a\*</sup> Linda Bergamini,<sup>a</sup> Nicola Monti,<sup>a</sup> Stefano Zacchini,<sup>a</sup> Sally E. Plush,<sup>b</sup> Massimiliano Massi,<sup>c</sup> Alejandro Hochkoepler,<sup>d, e</sup> Alessandra Stefan,<sup>d, e\*</sup>

Stefano Stagni<sup>a\*</sup>

*a: Department of Industrial Chemistry "Toso Montanari", University of Bologna, Viale Risorgimento 4, I-40136 Bologna, Italy.*

*b: School of Pharmacy and Medical Sciences and the Future Industries Institute University of South Australia, Adelaide, Australia.*

*c: Curtin Institute for Functional Molecules and Interfaces, School of Molecular and Life Science, Curtin University, Kent Street, Bentley 6102 WA, Australia.*

*d: CSGI, Department of Chemistry, University of Florence, I-50019 Sesto Fiorentino (FI), Italy.*

*e: Department of Pharmacy and Biotechnology, University of Bologna, Viale Risorgimento 4, I-40136 Bologna, Italy.*

### ESI – Electronic Supplementary Information

**Table S1.** Stretching frequencies ( $\text{cm}^{-1}$ ) of the CO bands of all the Re(I) complexes reported in this work. Values are relative to solution state (dichloromethane as the solvent) IR spectra recorded at room temperature.

| Complex                                                     | CO A'(1) | CO A'(2)/A'' |
|-------------------------------------------------------------|----------|--------------|
| <i>fac</i> -[Re(CO) <sub>3</sub> (BCS)(Tph)] <sup>2-</sup>  | 2029     | 1918         |
| <i>fac</i> -[Re(CO) <sub>3</sub> (BPS)(Tph)] <sup>2-</sup>  | 2026     | 1914         |
| <i>fac</i> -[Re(CO) <sub>3</sub> (BC)(Tph)]                 | 2022     | 1918         |
| <i>fac</i> -[Re(CO) <sub>3</sub> (BC)(Tph-Me)] <sup>+</sup> | 2037     | 1934         |

**Figure S1:** ESI-MS of *fac*-[Re(CO)<sub>3</sub>(BCS)(Tph)]<sup>2-</sup>, negative region ions, CH<sub>3</sub>OH.

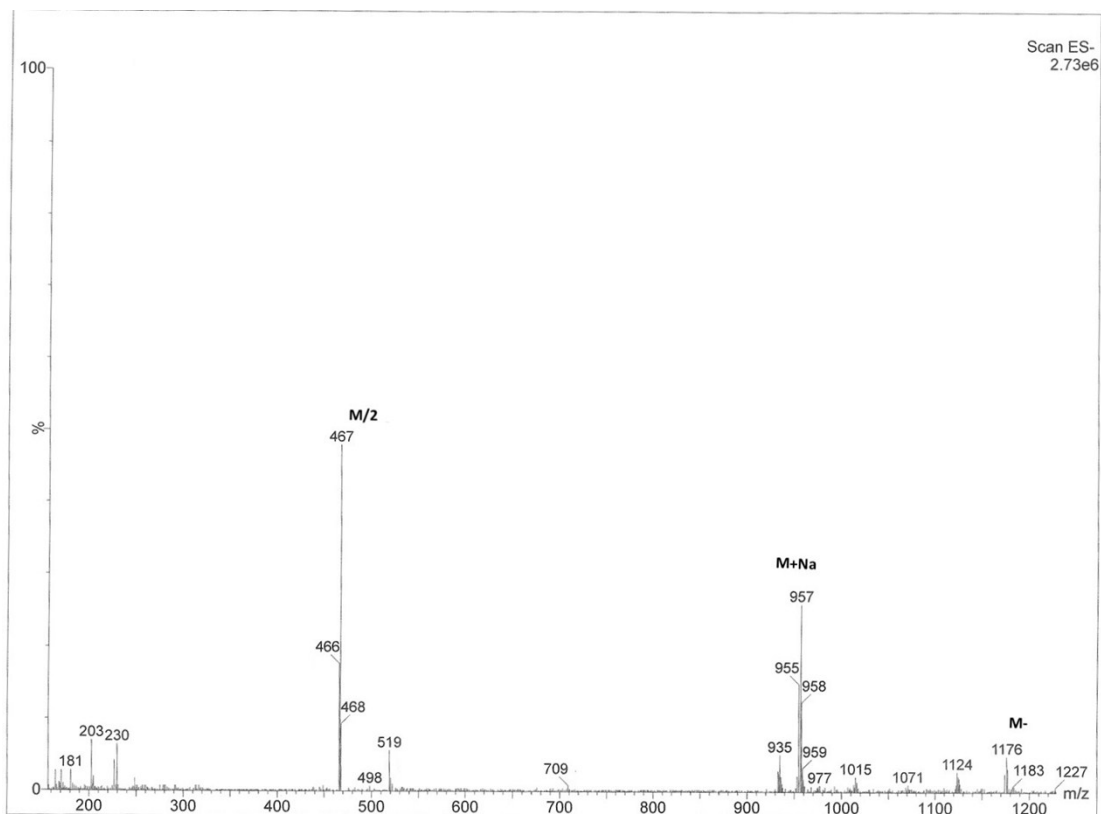

**Figure S2:** ESI-MS of *fac*-[Re(CO)<sub>3</sub>(BPS)(Tph)]<sup>2-</sup>, negative region ions, CH<sub>3</sub>OH.

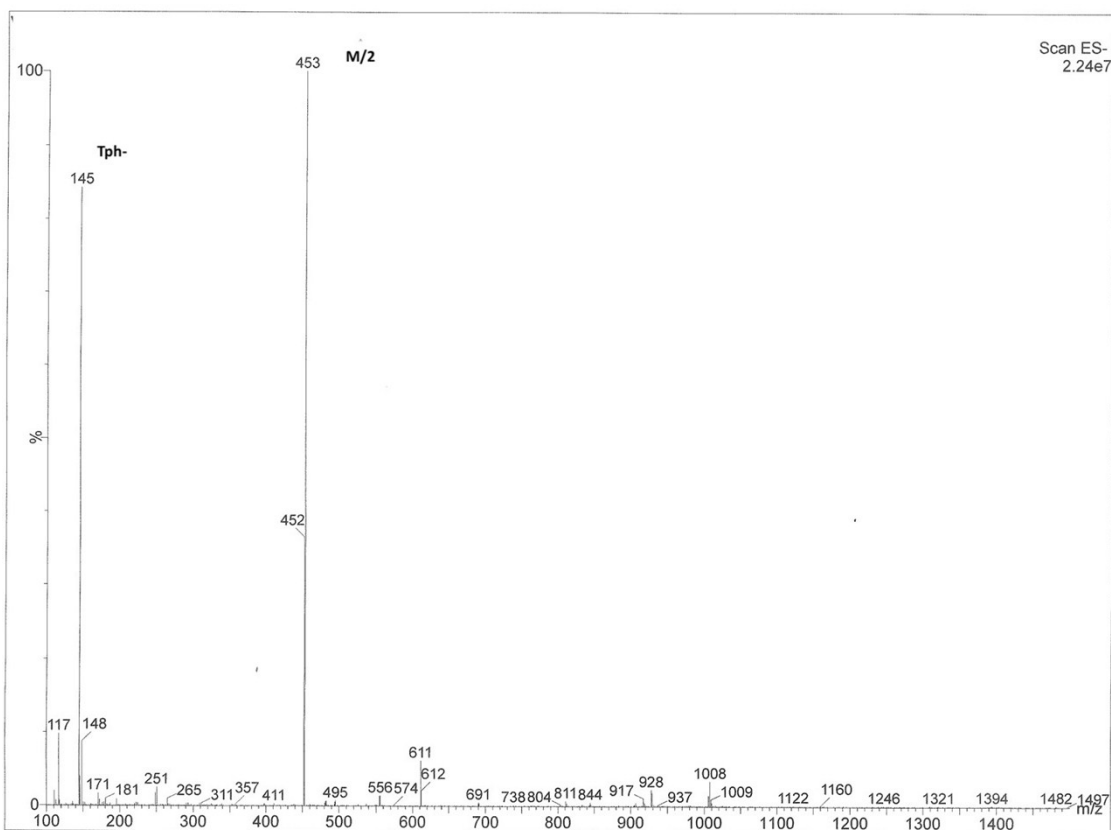



**Figure S3:** ESI-MS of *fac*-[Re(CO)<sub>3</sub>(BC)(Tph)], positive region ions, CH<sub>3</sub>CN.

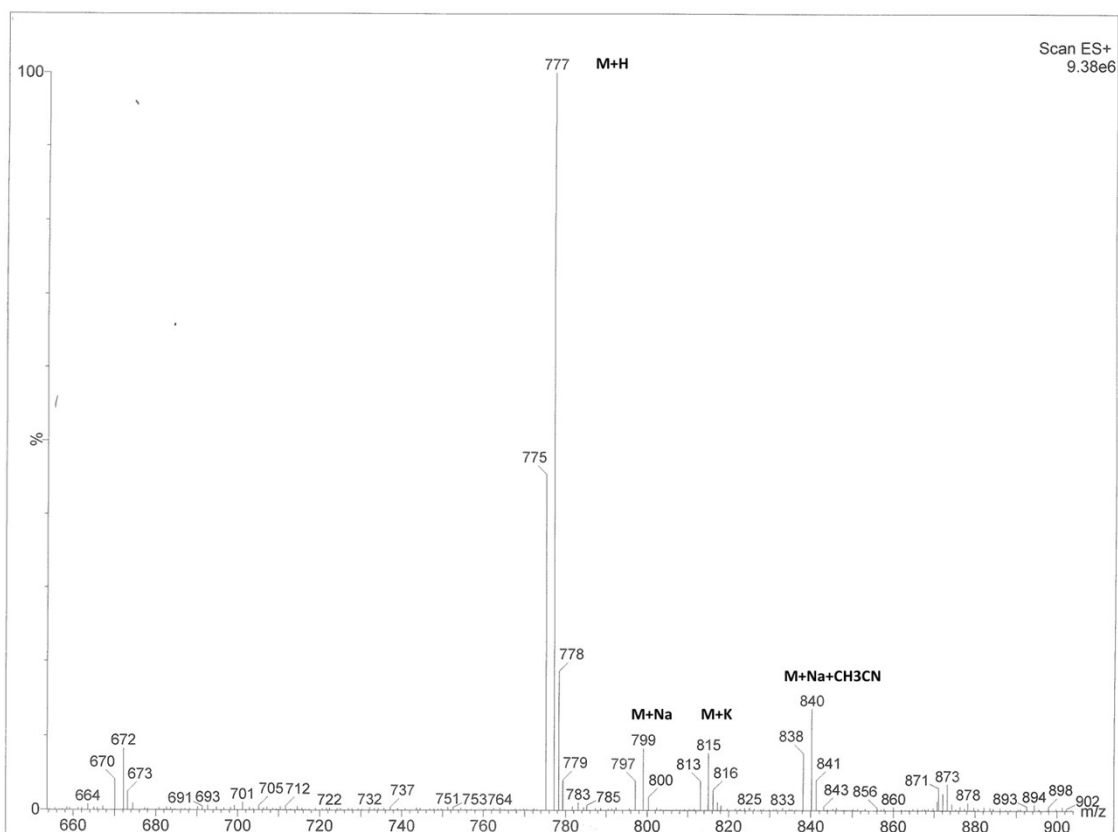

**Figure S4:** ESI-MS of *fac*-[Re(CO)<sub>3</sub>(BC)(Tph-Me)]<sup>+</sup>, positive region ions, CH<sub>3</sub>CN.

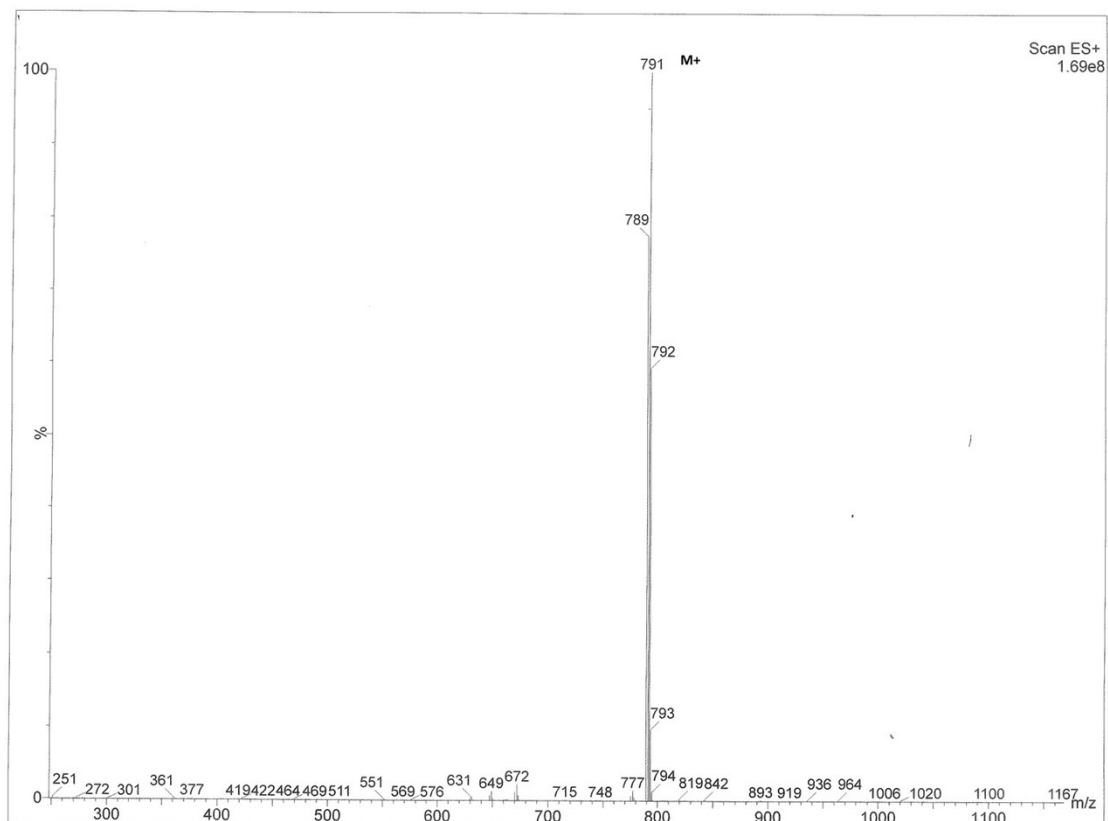

**Figure S5:**  $^1\text{H}$  NMR of  $\text{fac-}[\text{Re}(\text{CO})_3(\text{BCS})(\text{Tph})]^{2-}$ ,  $\text{CD}_3\text{OD}$ , 400 MHz, 298K.

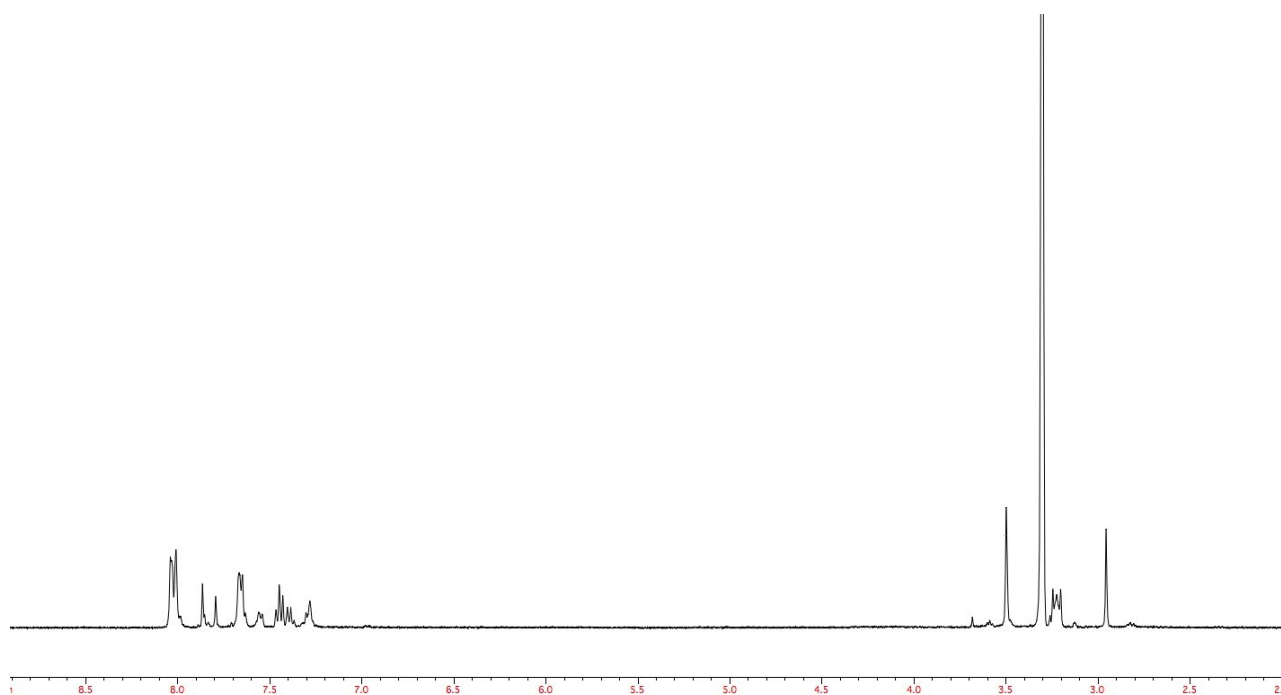

**Figure S6:**  $^{13}\text{C}$  NMR of  $\text{fac-}[\text{Re}(\text{CO})_3(\text{BCS})(\text{Tph})]^{2-}$ ,  $\text{CD}_3\text{OD}$ , 100 MHz, 298K.

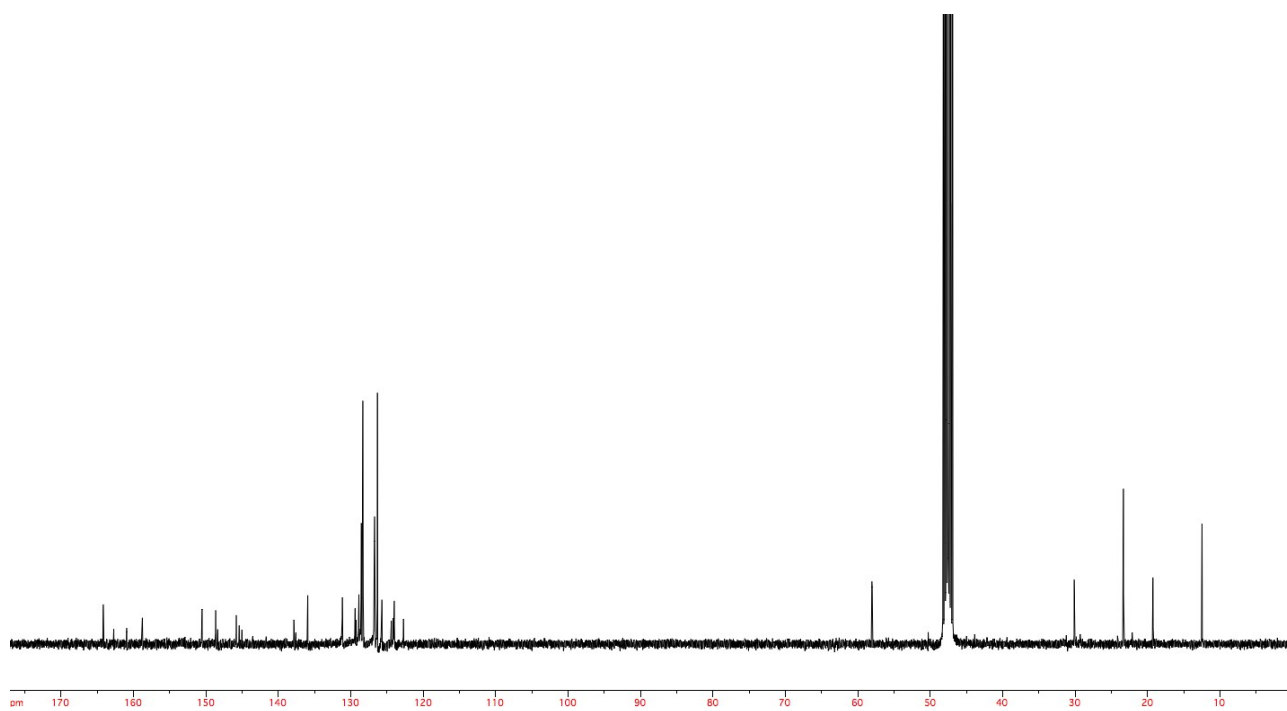

**Figure S7:**  $^1\text{H}$  NMR of  $\text{fac-}[\text{Re}(\text{CO})_3(\text{BPS})(\text{Tph})]^{2-}$ ,  $\text{CD}_3\text{OD}$ , 400 MHz, 298K.

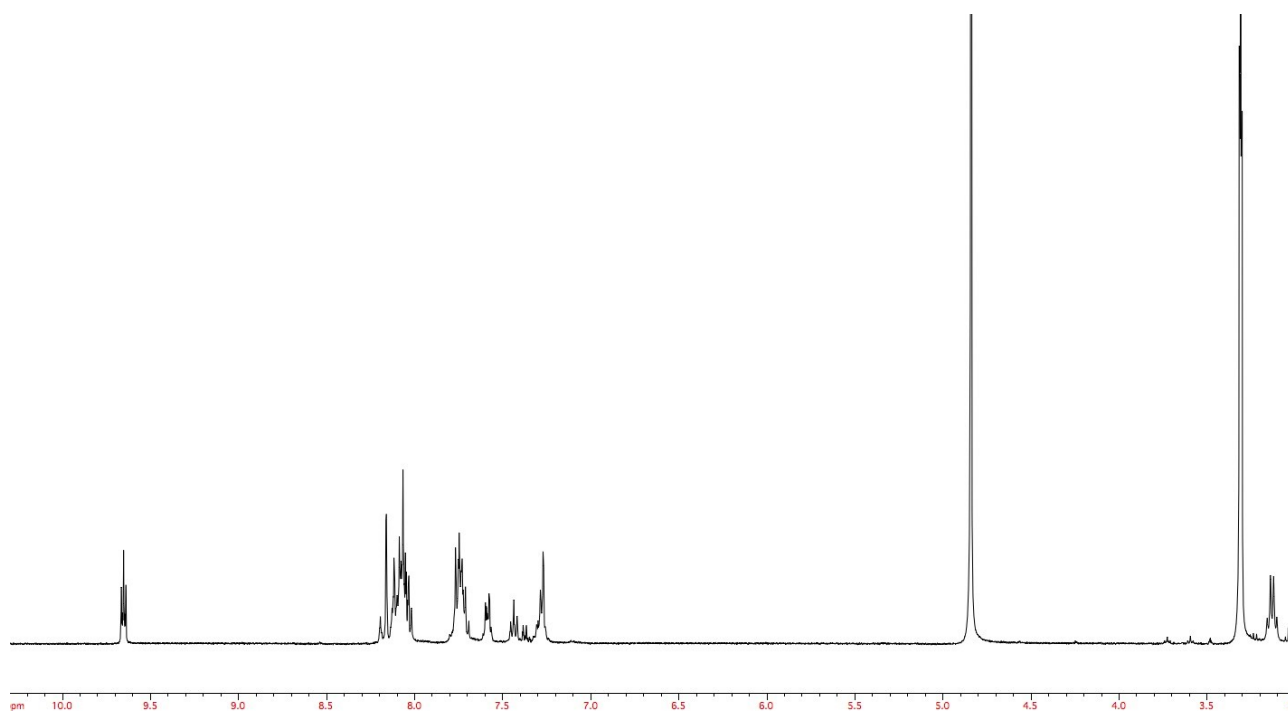

**Figure S8:**  $^{13}\text{C}$  NMR of  $\text{fac-}[\text{Re}(\text{CO})_3(\text{BPS})(\text{Tph})]^{2-}$ ,  $\text{CD}_3\text{OD}$ , 100 MHz, 298K.

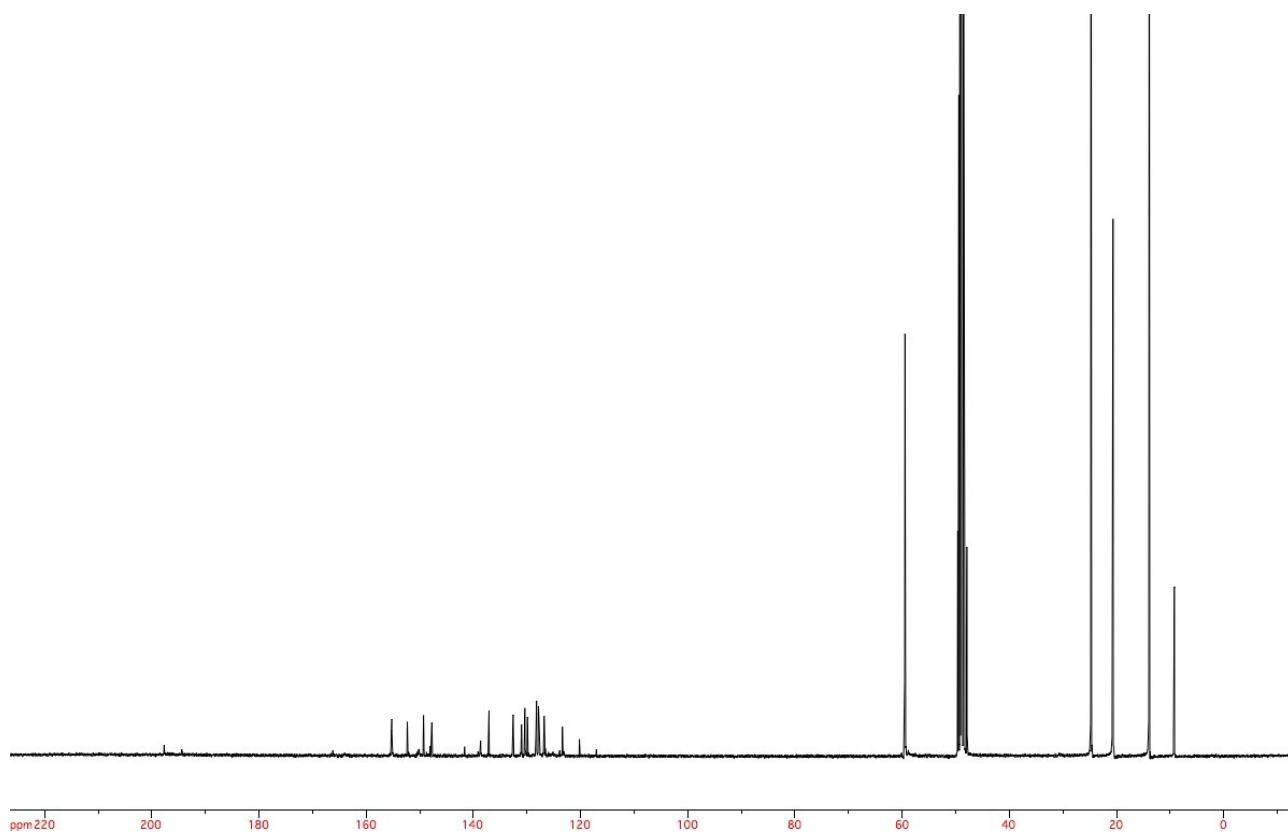

**Figure S9:**  $^1\text{H}$  NMR of *fac*- $[\text{Re}(\text{CO})_3(\text{BC})(\text{Tph})]$ , Acetone  $d^6$ , 400 MHz, 298K.

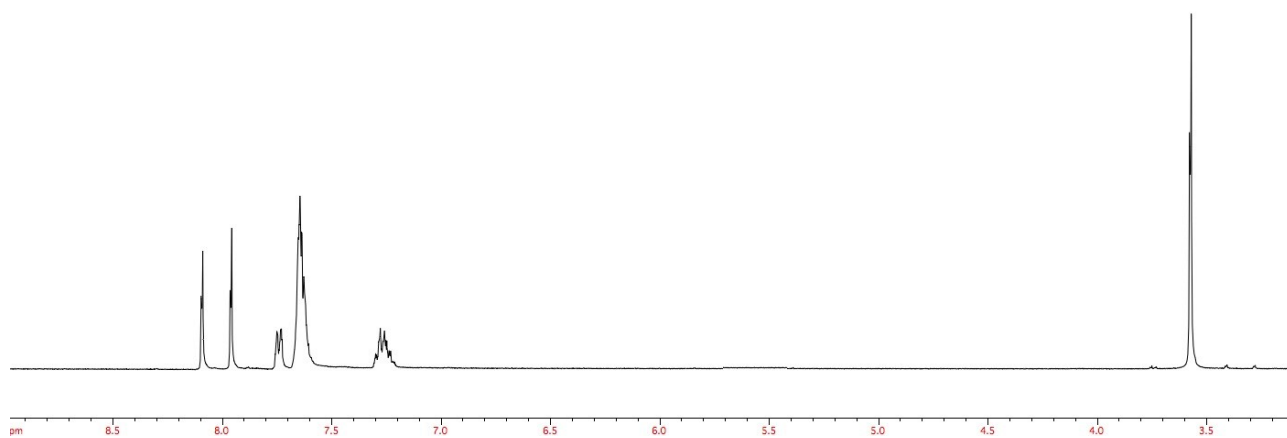

**Figure S10:**  $^{13}\text{C}$  NMR of *fac*- $[\text{Re}(\text{CO})_3(\text{BC})(\text{Tph})]$ , Acetone  $d^6$ , 100 MHz, 298K.

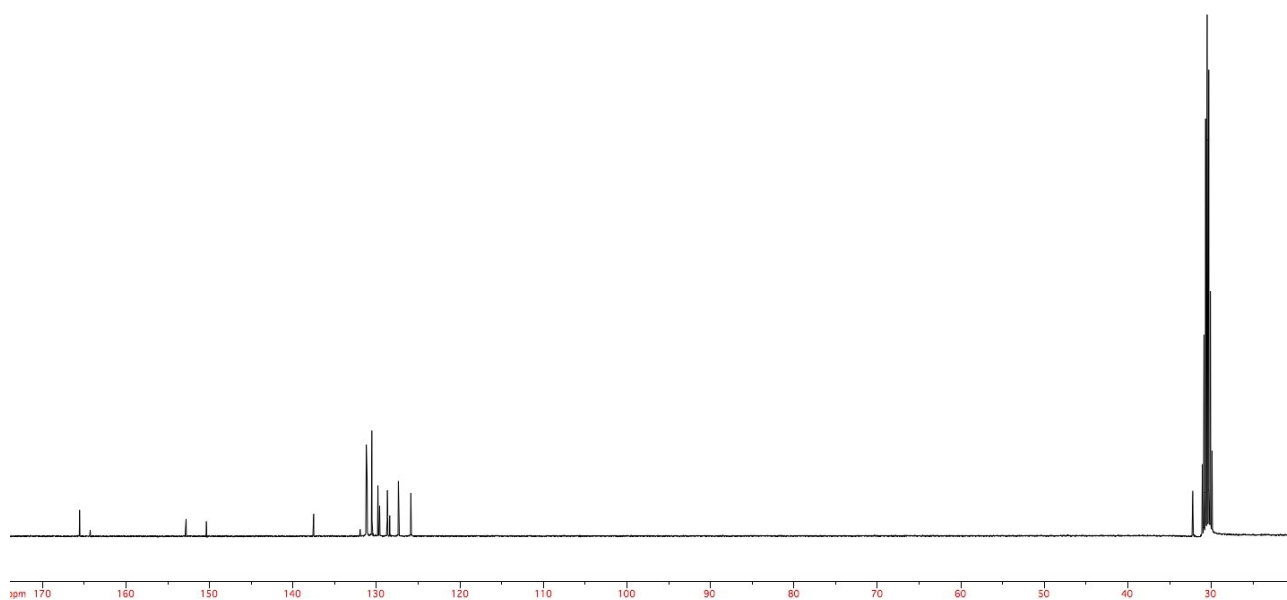



**Figure S11:**  $^1\text{H}$ - $^1\text{H}$  COSY NMR of *fac*- $[\text{Re}(\text{CO})_3(\text{BC})(\text{Tph})]$ , Acetone  $d_6$ , 600 MHz, 298K.

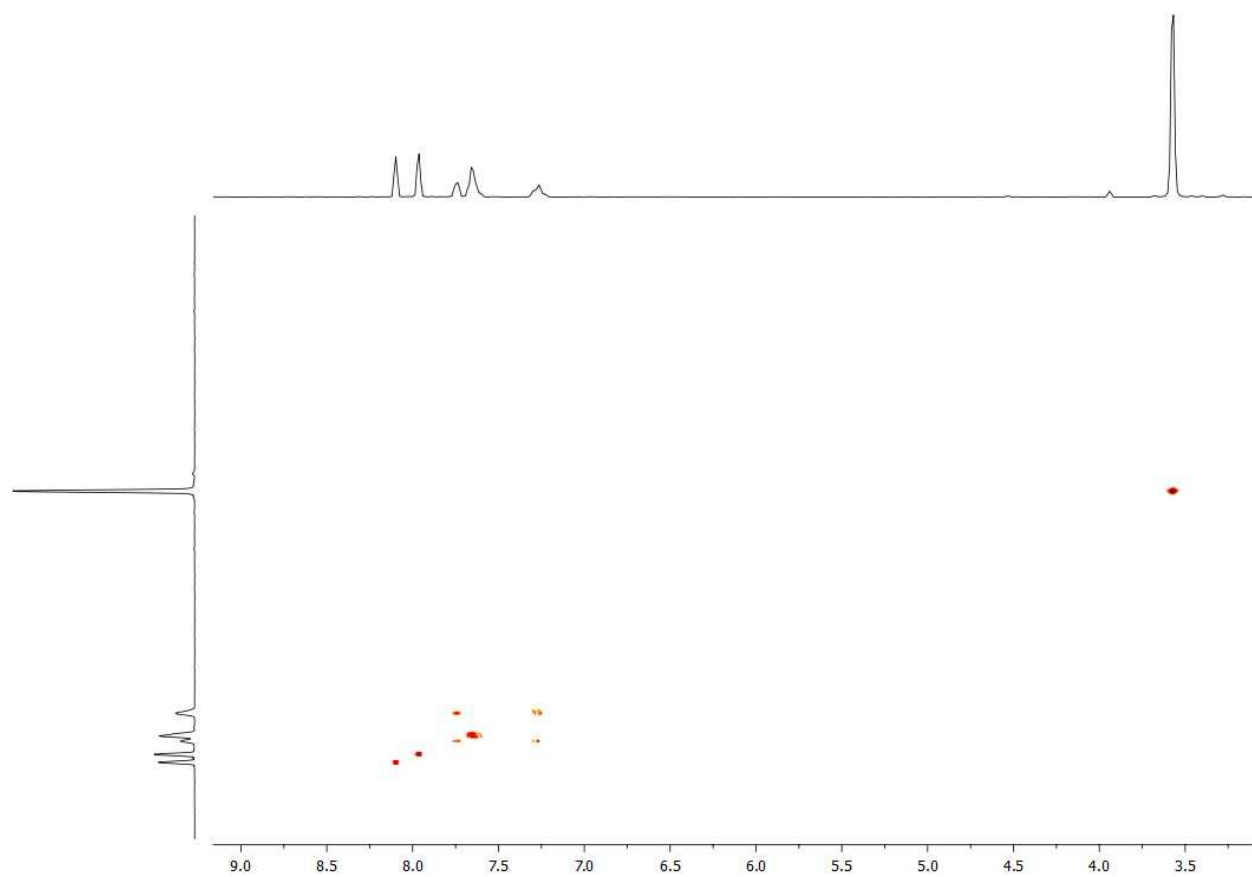

Figure S12:  $^1\text{H}$  NMR of  $\text{fac-}[\text{Re}(\text{CO})_3(\text{BC})(\text{Tph-Me})]^+$ , Acetone  $d^6$ , 400 MHz, 298K.

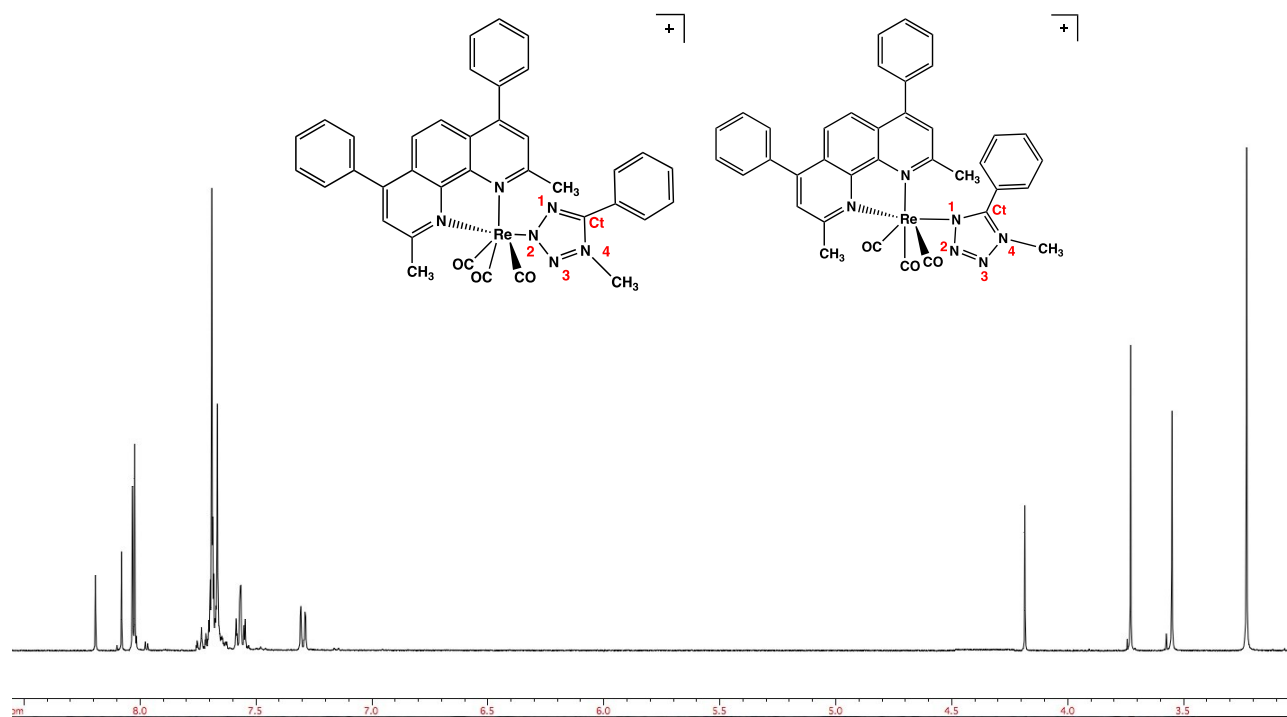

Figure S13:  $^{13}\text{C}$  NMR of  $\text{fac-}[\text{Re}(\text{CO})_3(\text{BC})(\text{Tph-Me})]^+$ , Acetone  $d^6$ , 100 MHz, 298K.

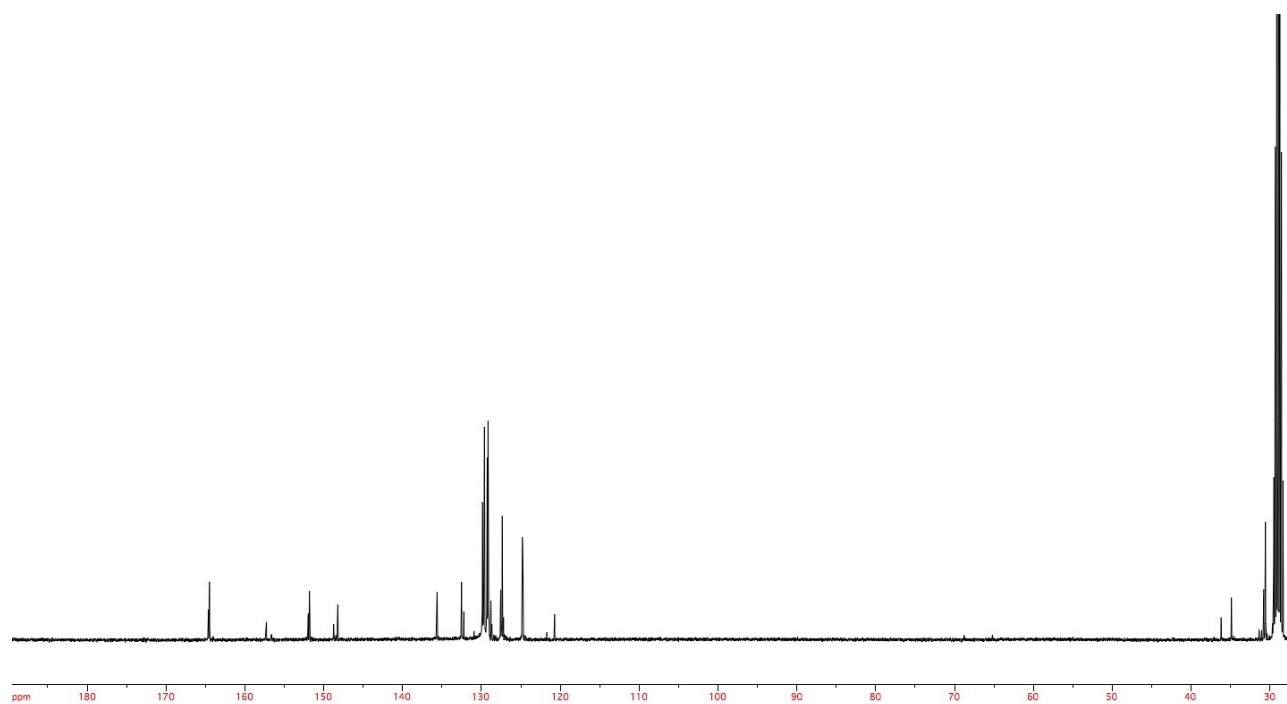

**Figure S14:**  $^1\text{H}$ - $^1\text{H}$  COSY NMR of *fac*- $[\text{Re}(\text{CO})_3(\text{BC})(\text{Tph-Me})]^+$ , Acetone  $d^6$ , 600 MHz, 298K.

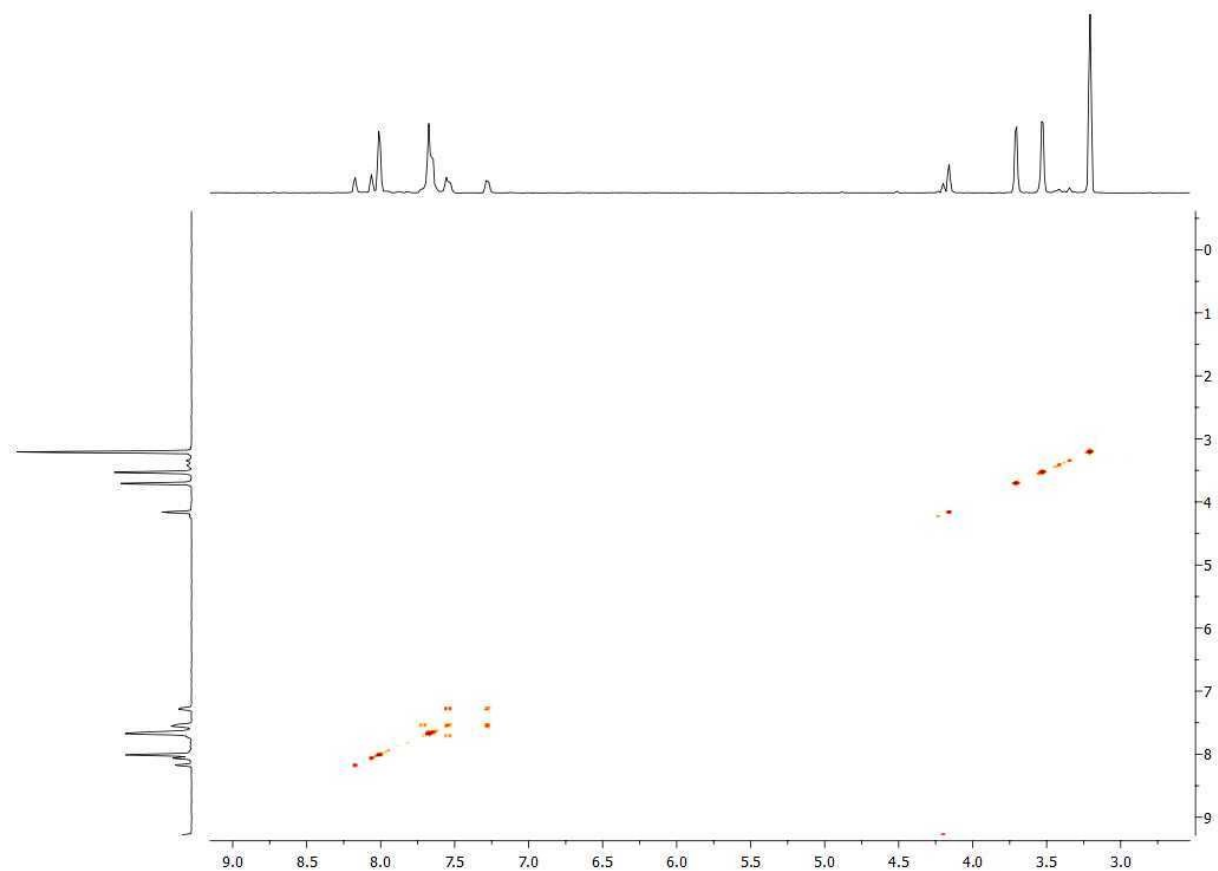

**Figure S15:**  $^1\text{H}$  NMR and NOESY (overlay, 3.22 and 3.55 ppm) NMR of *fac*- $[\text{Re}(\text{CO})_3(\text{BC})(\text{Tph-Me})]^+$ , Acetone  $d^6$ , 400 MHz, 298K.

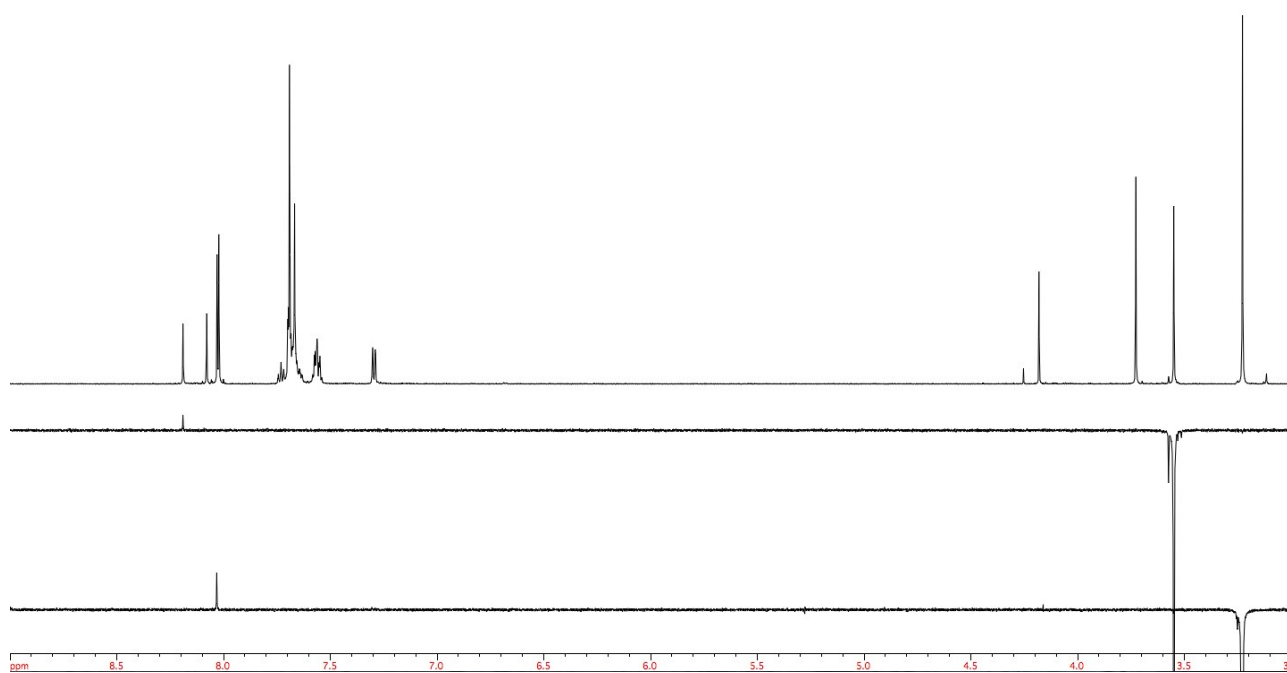

**Figure S16:** Absorption Profile of  $fac-[Re(CO)_3(BCS)(Tph)]^{2-}$  in  $CH_3OH$  (red line) and  $H_2O$  (blue line),  $10^{-5}M$ , 298K.

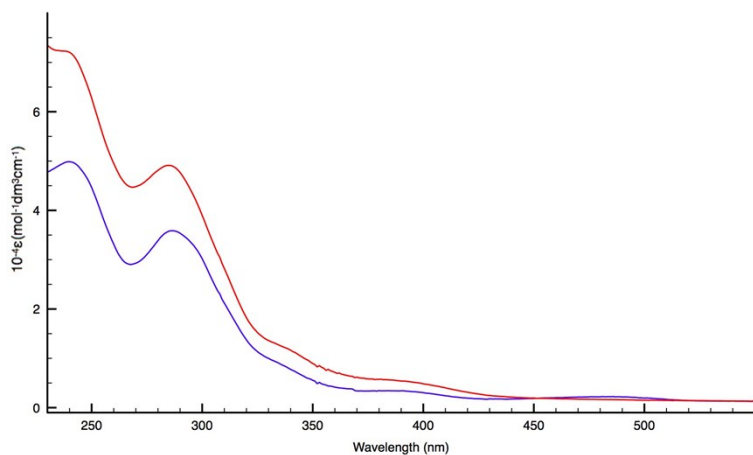

**Figure S17:** Emission Profile of  $fac-[Re(CO)_3(BCS)(Tph)]^{2-}$  air-equilibrated (black line) and deoxygenated solution (blue line),  $10^{-5}M$ ,  $CH_3OH$ , 298K.

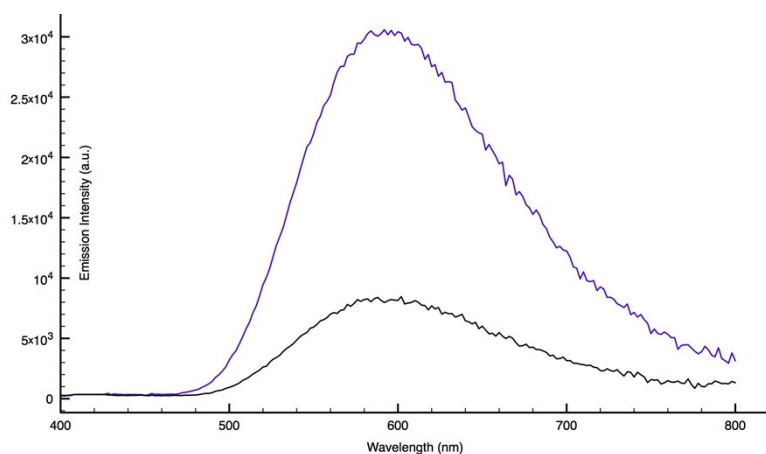

**Figure S18:** Emission Profile of  $fac-[Re(CO)_3(BCS)(Tph)]^{2-}$  air-equilibrated (black line) and deoxygenated solution (blue line),  $10^{-5}M$ ,  $H_2O$ , 298K.

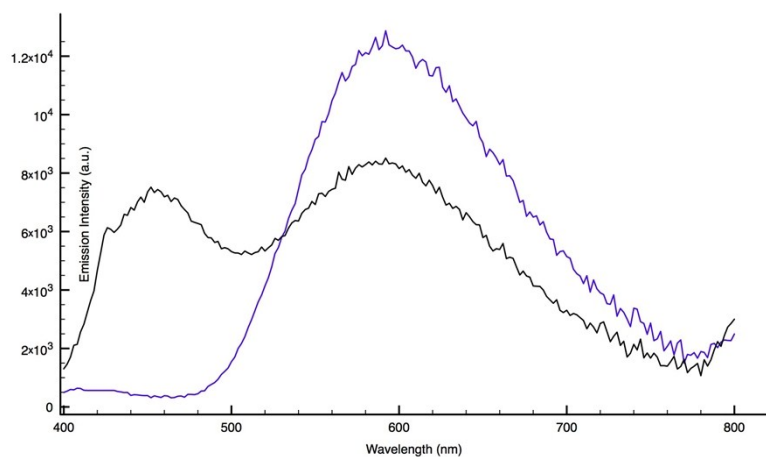

**Figure S19:** Emission Map of  $fac-[Re(CO)_3(BCS)(Tph)]^{2-}$ ,  $10^{-5}M$ , H<sub>2</sub>O, 298K.

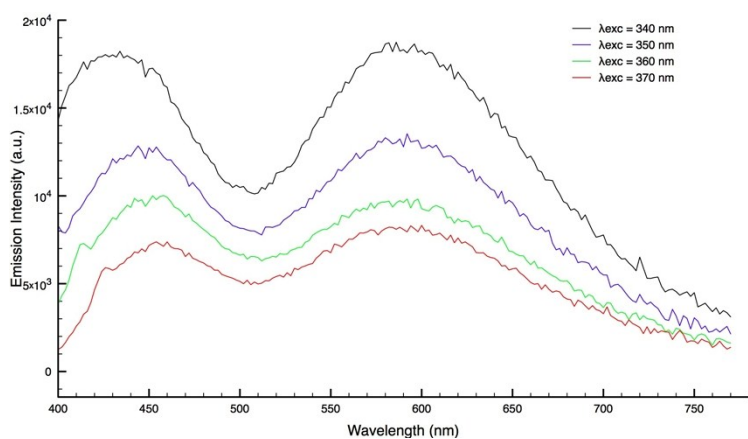

**Figure S20:** Excitation Profile of  $fac-[Re(CO)_3(BCS)(Tph)]^{2-}$  CH<sub>3</sub>OH (black line) H<sub>2</sub>O (blue line),  $10^{-5}M$ , CH<sub>3</sub>OH, 298K.

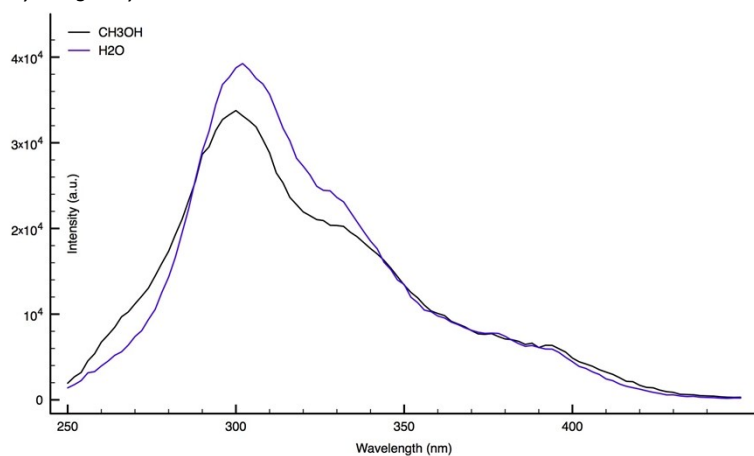

**Figure S21:** Emission Profile of  $fac-[Re(CO)_3(BCS)(Tph)]^{2-}$ ,  $10^{-5}M$ , CH<sub>3</sub>OH, 77K.

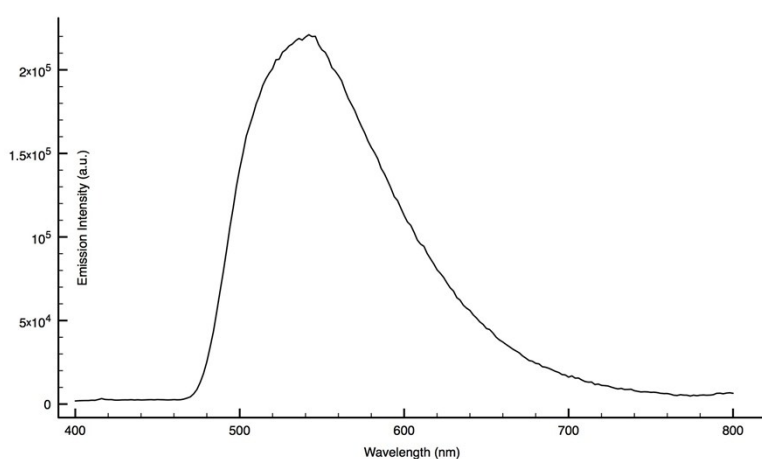

**Figure S22:** Absorption Profile of  $fac-[Re(CO)_3(BPS)(Tph)]^{2-}$  in  $CH_2Cl_2$  (red line) and  $H_2O$  (blue line),  $10^{-5}M$ , 298K.

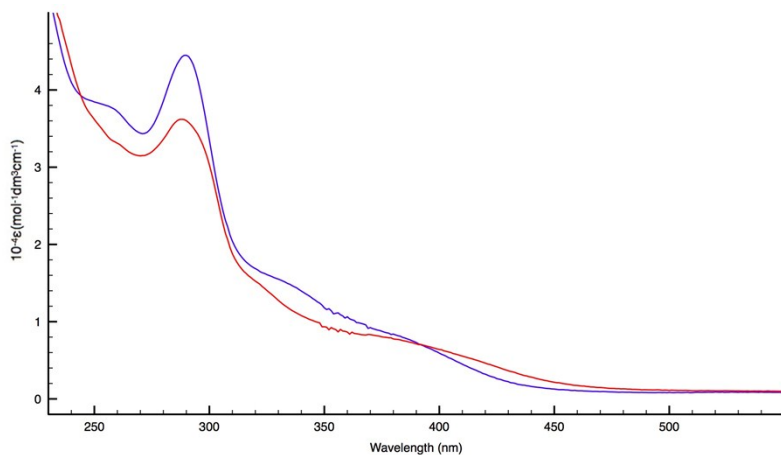

**Figure S23:** Emission Profile of  $fac-[Re(CO)_3(BPS)(Tph)]^{2-}$  air-equilibrated (black line) and deoxygenated solution (blue line),  $10^{-5}M$ ,  $CH_2Cl_2$ , 298K.

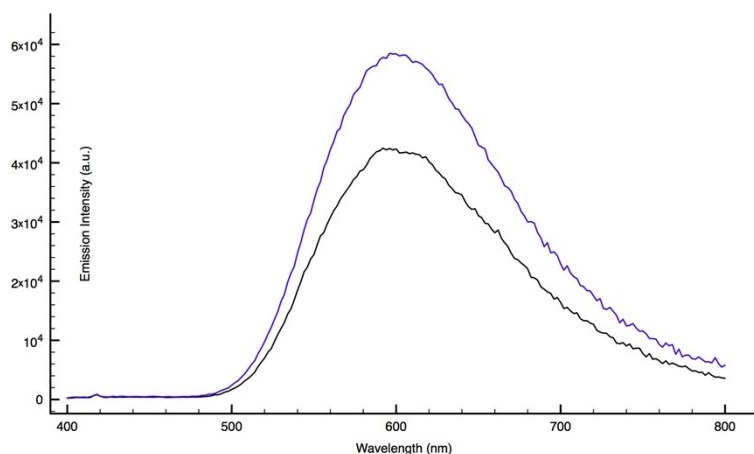

**Figure S24:** Emission Profile of  $fac-[Re(CO)_3(BPS)(Tph)]^{2-}$ ,  $10^{-5}M$ ,  $H_2O$ , 298K.

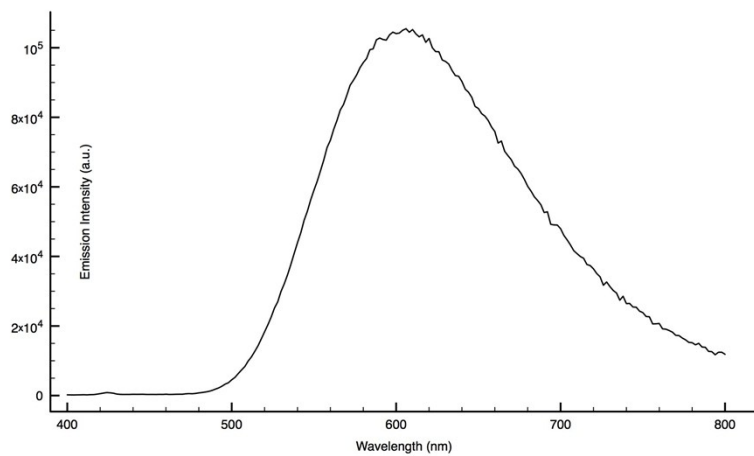

**Figure S25:** Excitation Profile of *fac*-[Re(CO)<sub>3</sub>(BPS)(Tph)]<sup>2-</sup> CH<sub>2</sub>Cl<sub>2</sub> (black line) H<sub>2</sub>O (blue line), 10<sup>-5</sup>M, CH<sub>3</sub>OH, 298K.

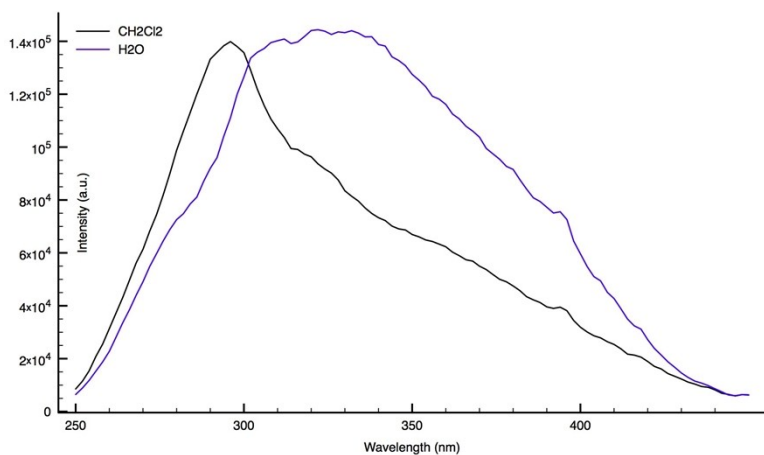

**Figure S26:** Emission Profile of *fac*-[Re(CO)<sub>3</sub>(BPS)(Tph)]<sup>2-</sup>, 10<sup>-5</sup>M, CH<sub>2</sub>Cl<sub>2</sub>, 77K.

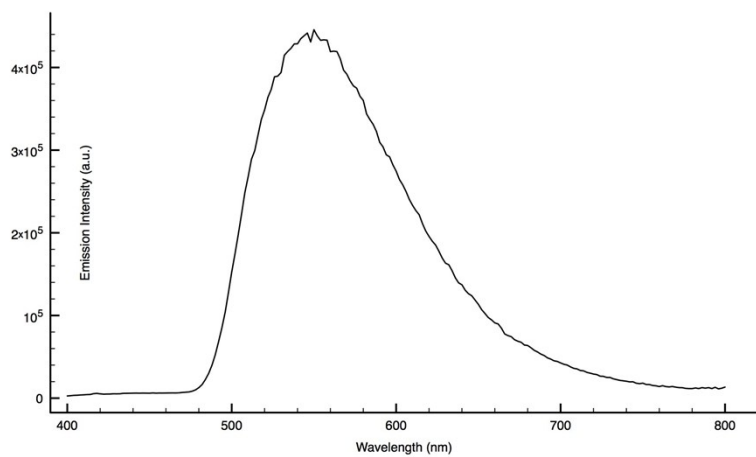

**Figure S27:** Absorption Profile of *fac*-[Re(CO)<sub>3</sub>(BC)(Tph)] 10<sup>-5</sup>M, CH<sub>2</sub>Cl<sub>2</sub>, 298K.

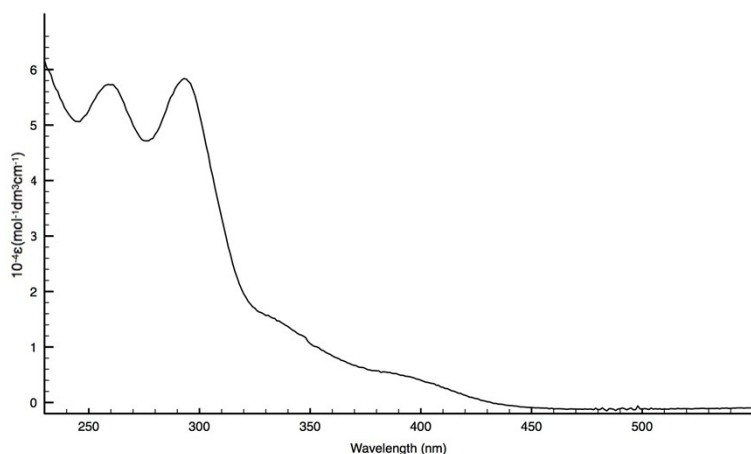

**Figure S28:** Emission Profile of *fac*-[Re(CO)<sub>3</sub>(BC)(Tph)] air-equilibrated (black line) and deoxygenated solution (blue line), 10<sup>-5</sup>M, CH<sub>2</sub>Cl<sub>2</sub>, 298K.

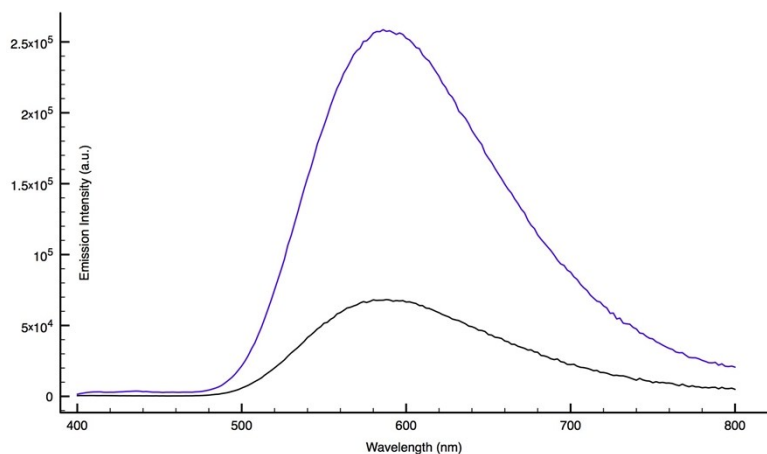

**Figure S29:** Excitation Profile of *fac*-[Re(CO)<sub>3</sub>(BC)(Tph)] 10<sup>-5</sup>M, CH<sub>2</sub>Cl<sub>2</sub>, 298K.

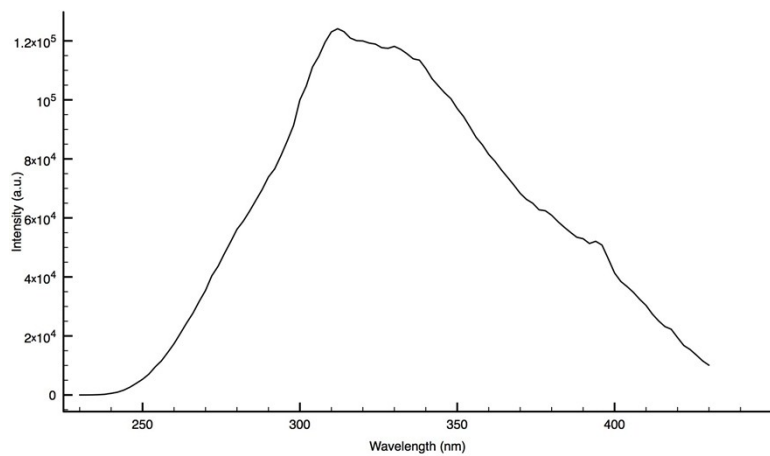



**Figure S30:** Emission Profile of *fac*-[Re(CO)<sub>3</sub>(BC)(Tph)],  $\lambda_{\text{exc}} = 370 \text{ nm}$ ,  $10^{-5}\text{M}$ , CH<sub>2</sub>Cl<sub>2</sub>, 298K.

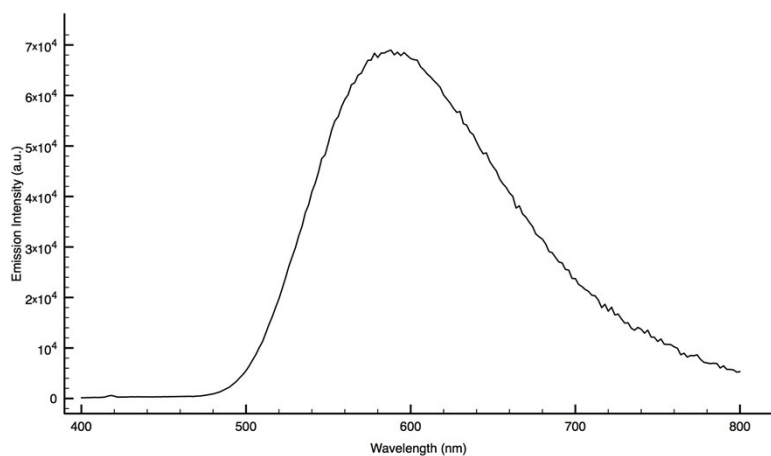

**Figure S31:** Emission Profile of *fac*-[Re(CO)<sub>3</sub>(BC)(Tph)],  $\lambda_{\text{exc}} = 302 \text{ nm}$ ,  $10^{-5}\text{M}$ , CH<sub>2</sub>Cl<sub>2</sub>, 298K.

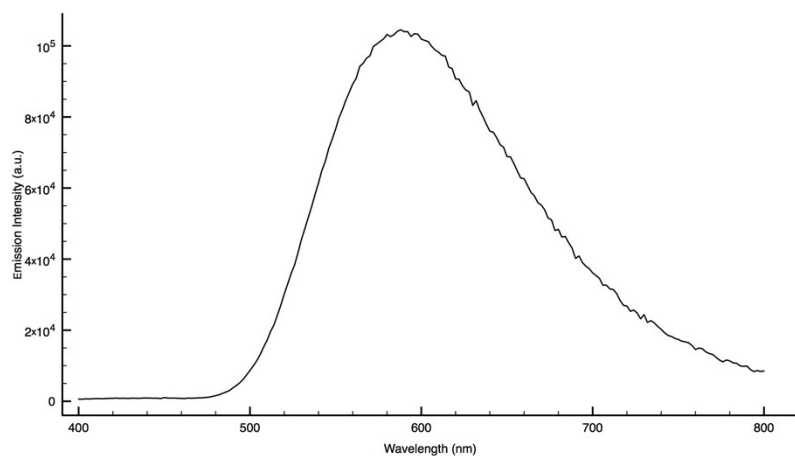

**Figure S32:** Emission Profile of *fac*-[Re(CO)<sub>3</sub>(BC)(Tph)],  $10^{-5}\text{M}$ , CH<sub>2</sub>Cl<sub>2</sub>, 77K.

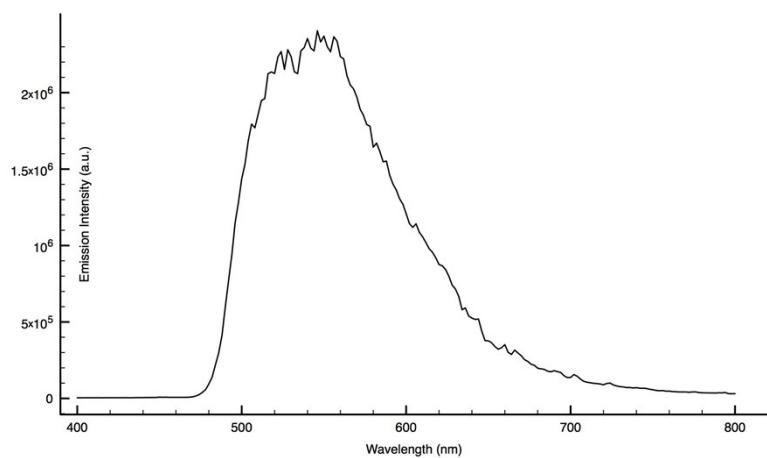

**Figure S33:** Absorption Profile of *fac*-[Re(CO)<sub>3</sub>(BC)(Tph-Me)]<sup>+</sup> 10<sup>-5</sup>M, CH<sub>2</sub>Cl<sub>2</sub>, 298K.

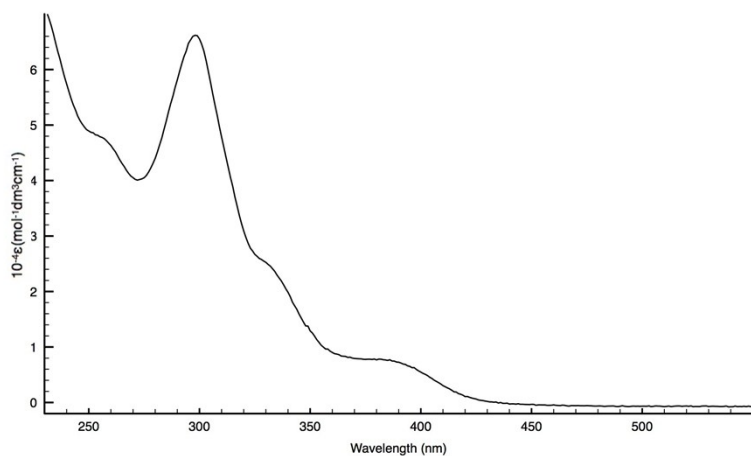

**Figure S34:** Emission Profile of *fac*-[Re(CO)<sub>3</sub>(BC)(Tph-Me)]<sup>+</sup> air-equilibrated (black line) and deoxygenated solution (blue line), 10<sup>-5</sup>M, CH<sub>2</sub>Cl<sub>2</sub>, 298K.

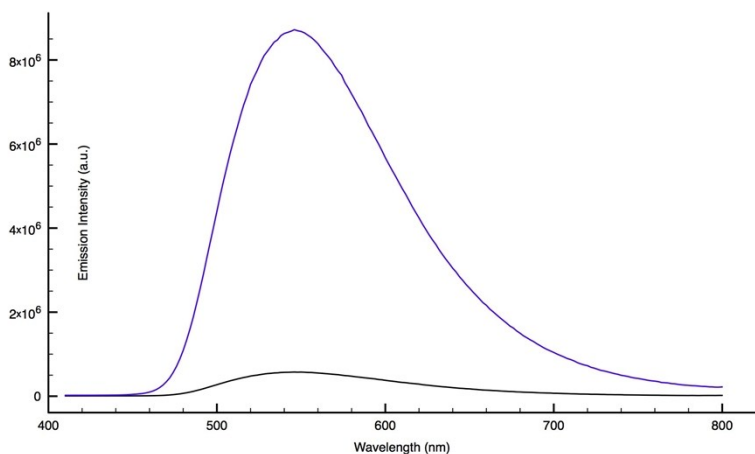

**Figure S35:** Excitation Profile of *fac*-[Re(CO)<sub>3</sub>(BC)(Tph-Me)]<sup>+</sup> 10<sup>-5</sup>M, CH<sub>2</sub>Cl<sub>2</sub>, 298K.

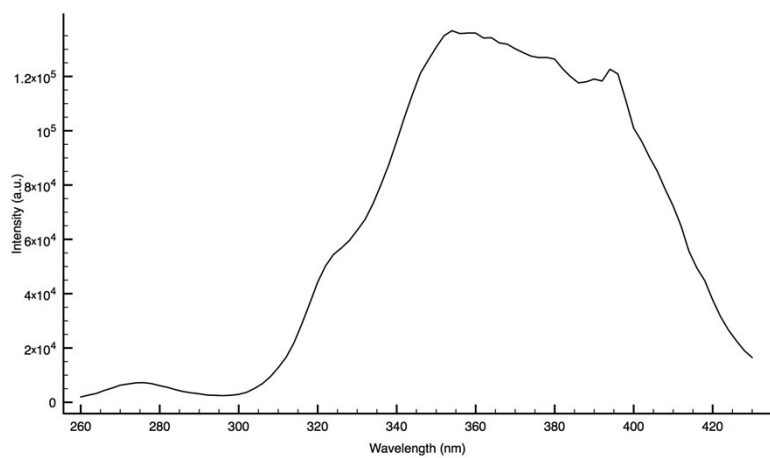

**Figure S36:** Emission Profile of  $fac\text{-[Re(CO)}_3\text{(BC)(Tph-Me)]}^+$ ,  $\lambda_{\text{exc}} = 370 \text{ nm}$ ,  $10^{-5}\text{M}$ ,  $\text{CH}_2\text{Cl}_2$ , 298K.

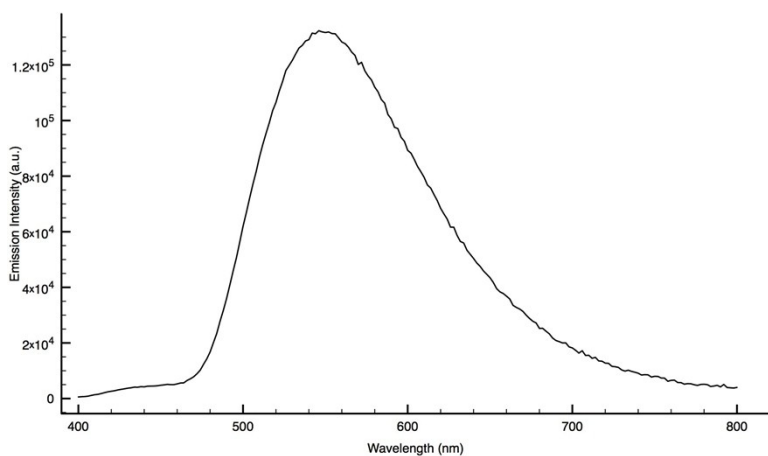

**Figure S37:** Emission Profile of  $fac\text{-[Re(CO)}_3\text{(BC)(Tph-Me)]}^+$ ,  $\lambda_{\text{exc}} = 302 \text{ nm}$ ,  $10^{-5}\text{M}$ ,  $\text{CH}_2\text{Cl}_2$ , 298K.

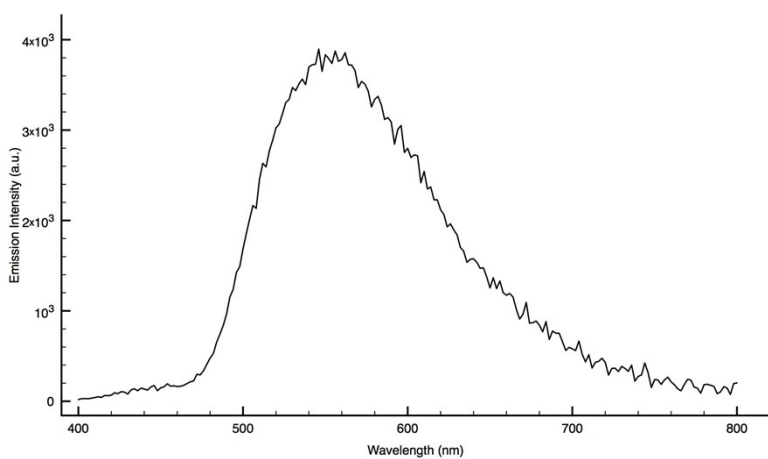

**Figure S38:** Emission Profile of  $fac\text{-[Re(CO)}_3\text{(BC)(Tph-Me)]}^+$  ( $\lambda_{\text{exc}} = 370 \text{ nm}$  blue line) and  $fac\text{-[Re(CO)}_3\text{(BC)(Tph-Me)]}^+$  ( $\lambda_{\text{exc}} = 302 \text{ nm}$  black line),  $10^{-5}\text{M}$ ,  $\text{CH}_2\text{Cl}_2$ , 298K.

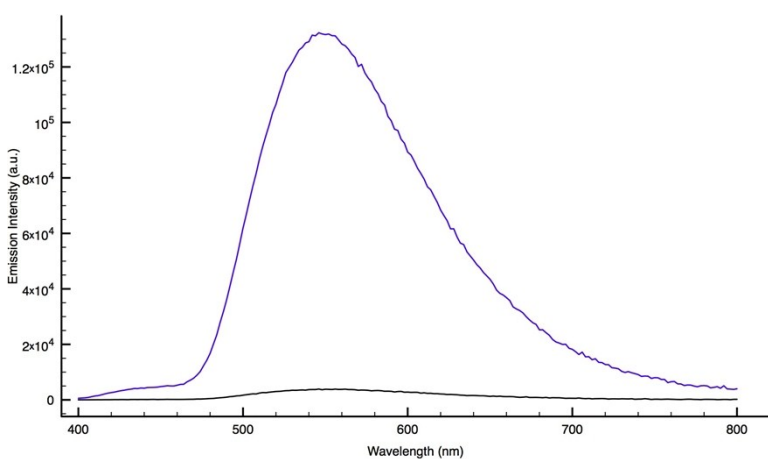

**Figure S39:** Emission Profile of  $fac-[Re(CO)_3(BC)(Tph-Me)]^+$ ,  $10^{-5}M$ ,  $CH_2Cl_2$ , 77K.

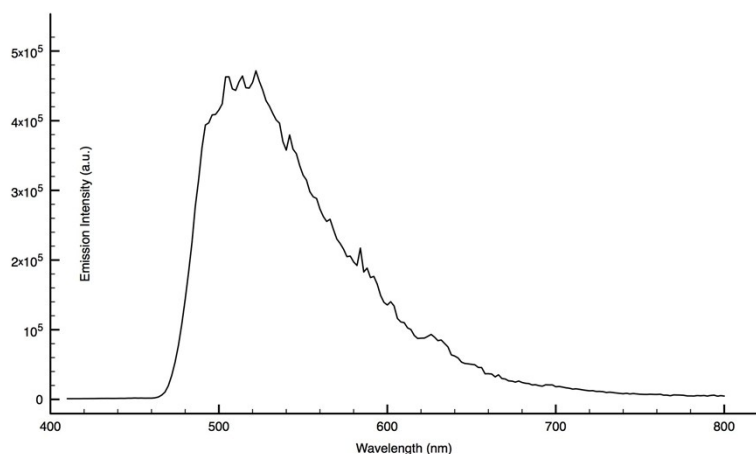

**Figure S40:** Excitation Profile of  $fac-[Re(CO)_3(BC)(Tph)]$  (black line) and  $fac-[Re(CO)_3(BC)(Tph-Me)]^+$  (blue line),  $10^{-5}M$ ,  $CH_2Cl_2$ , 298K.

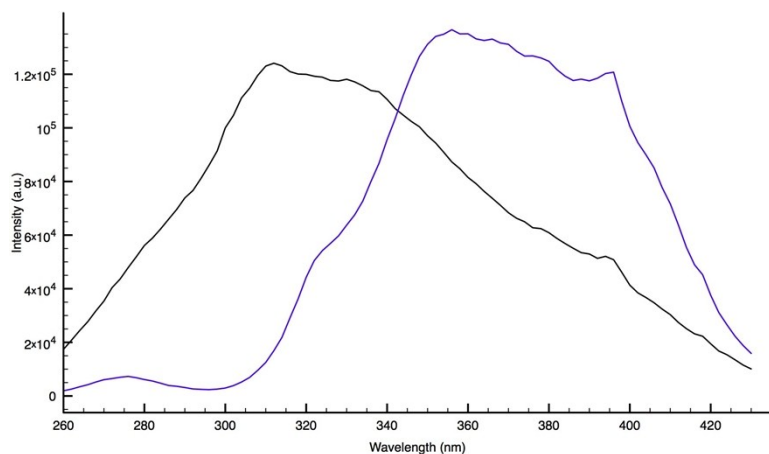

**Figure S41:** Normalized Emission Profile of  $fac-[Re(CO)_3(BC)(Tph)]$  (black line) and  $fac-[Re(CO)_3(BC)(Tph-Me)]^+$  (blue line),  $10^{-5}M$ ,  $CH_2Cl_2$ , 298K.

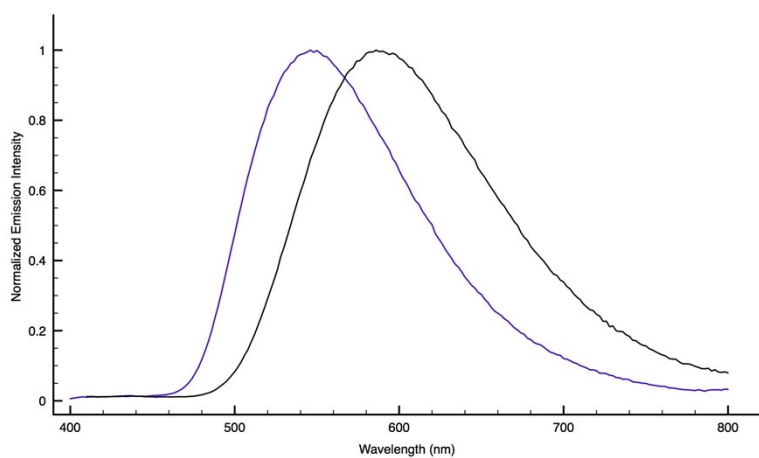

**Table S2** - Crystal data and collection details for *fac*-[Re(CO)<sub>3</sub>(BC)(Tph)].

|                                                      |                                                                  |
|------------------------------------------------------|------------------------------------------------------------------|
| Formula                                              | C <sub>36</sub> H <sub>25</sub> N <sub>6</sub> O <sub>3</sub> Re |
| Fw                                                   | 775.82                                                           |
| T, K                                                 | 100(2)                                                           |
| $\lambda$ , Å                                        | 0.71073                                                          |
| Crystal system                                       | Orthorhombic                                                     |
| Space Group                                          | <i>Pbca</i>                                                      |
| a, Å                                                 | 10.9090(8)                                                       |
| b, Å                                                 | 22.6914(18)                                                      |
| c, Å                                                 | 24.2243(19)                                                      |
| Cell Volume, Å <sup>3</sup>                          | 5996.5(8)                                                        |
| Z                                                    | 8                                                                |
| D <sub>c</sub> , g cm <sup>-3</sup>                  | 1.719                                                            |
| $\mu$ , mm <sup>-1</sup>                             | 4.102                                                            |
| F(000)                                               | 3056                                                             |
| Crystal size, mm                                     | 0.16×0.13×0.12                                                   |
| $\theta$ limits, °                                   | 1.681–26.999                                                     |
| Index ranges                                         | -13 ≤ h ≤ 13<br>-28 ≤ k ≤ 28<br>-30 ≤ l ≤ 30                     |
| Reflections collected                                | 81467                                                            |
| Independent reflections                              | 6538 [ <i>R</i> <sub>int</sub> = 0.0493]                         |
| Completeness to $\theta$ max                         | 100.0%                                                           |
| Data / restraints / parameters                       | 6538 / 0 / 417                                                   |
| Goodness on fit on F <sup>2</sup>                    | 1.189                                                            |
| R <sub>1</sub> ( <i>I</i> > 2 $\sigma$ ( <i>I</i> )) | 0.0333                                                           |
| wR <sub>2</sub> (all data)                           | 0.0548                                                           |
| Largest diff. peak and hole, e Å <sup>-3</sup>       | 1.069 / -2.060                                                   |
